# Supplementary material for: How the AHR Became Important in Cancer: The Role of Chronically Active AHR in Cancer Aggression
Source: PubMed Central journal article supplement (PMC7795223; doi:10.3390/ijms22010387), 2020-12-31
Supplement: ijms-22-00387-s001.pdf [file ijms-22-00387-s001.pdf]

| Gene (1-99) | Adjusted p value | Gene (100-199) | Adjusted p value | Gene (200-299) | Adjusted p value | Gene (300-399) |
|-------------|------------------|----------------|------------------|----------------|------------------|----------------|
| CYP1B1      | 8.69E-09         | ST6GALNAC2     | 0.00175734       | GBP4           | 0.007326569      | TNFRSF11B      |
| PLAT        | 1.87E-07         | CPE            | 0.00175734       | RAB18          | 0.007350148      | MDGA1          |
| PTGS2       | 1.22E-06         | SPDEF          | 0.00175734       | ABCG2          | 0.00735399       | ERAP1          |
| GALNT12     | 1.22E-06         | ADAMTS9        | 0.001872896      | LGR4           | 0.007391048      | IRAK2          |
| SERPINB2    | 1.68E-06         | NCOA3          | 0.001895845      | CENPI          | 0.007417989      | EML5           |
| IL1A        | 2.23E-06         | MMP14          | 0.001919555      | GRN            | 0.007437117      | RASD1          |
| PTPRJ       | 3.04E-06         | EMP1           | 0.002000424      | F2RL1          | 0.00777617       | HPGD           |
| SLC9A3R2    | 3.04E-06         | MB21D2         | 0.002027358      | OSR1           | 0.00777617       | USO1           |
| TXNIP       | 5.78E-06         | BTBD9          | 0.00213502       | GBP2           | 0.007870641      | FHL2           |
| IER3        | 9.72E-06         | EDEM2          | 0.002156054      | ADAM8          | 0.007911032      | BIRC3          |
| PTPN22      | 1.80E-05         | SLC7A11        | 0.002287646      | PFKP           | 0.007957492      | PLB1           |
| TMEM45B     | 1.87E-05         | IGFBP6         | 0.002287646      | ELK3           | 0.008002603      | FAM84B         |
| MFI2        | 1.87E-05         | FAH            | 0.00230407       | SUSD1          | 0.008114623      | SLC20A1        |
| PLEKHF1     | 2.10E-05         | RPP38          | 0.00230407       | ABHD4          | 0.008227515      | DLK2           |
| SHISA2      | 2.10E-05         | SHC4           | 0.002395643      | IRF1           | 0.008358042      | NFE2L3         |
| SLC37A2     | 2.52E-05         | TMEM156        | 0.002447991      | MYD88          | 0.008408773      | ARRDC4         |
| TGFB2       | 2.57E-05         | IL24           | 0.002556957      | DCLRE1C        | 0.0084807        | MOB1B          |
| FUCA1       | 2.97E-05         | ARHGAP12       | 0.002560952      | CFH            | 0.008525449      | PVRL3          |
| ADIRF       | 3.28E-05         | ENPP1          | 0.002567723      | USP6NL         | 0.008570325      | SAMD4A         |
| MAP4K4      | 3.61E-05         | CYP1A1         | 0.002592256      | GLIPR1         | 0.008705957      | PGBD1          |
| LAPTM5      | 3.62E-05         | C10orf25       | 0.002603735      | C1GALT1C1      | 0.008705957      | TNFRSF21       |
| TAP1        | 3.94E-05         | SLC9A7         | 0.002648998      | FOSL2          | 0.008724436      | P4HA1          |
| PDCD1LG2    | 4.11E-05         | LINC01269      | 0.002741978      | CAT            | 0.009018494      | DUSP22         |
| PDLIM5      | 8.87E-05         | REPS2          | 0.002792547      | GALNT6         | 0.00918253       | SUPT7L         |
| FNDC4       | 8.87E-05         | TMEM158        | 0.002898532      | C14orf169      | 0.009227068      | C11orf74       |
| EREG        | 9.55E-05         | RIPK4          | 0.002898532      | TPMT           | 0.009281091      | DHRS3          |
| TRAC        | 0.00010175       | KCTD20         | 0.002909869      | CMTM3          | 0.009659044      | DDX58          |
| EHF         | 0.000106252      | LIPH           | 0.003008815      | FHOD3          | 0.009712346      | FUT3           |
| PRRG4       | 0.000135466      | DUSP6          | 0.003008815      | MMP1           | 0.009943943      | CLIP4          |
| TIPARP      | 0.000135534      | IL6            | 0.003008815      | ZBED5-AS1      | 0.009943943      | ANGPTL2        |
| CXCL8       | 0.000160057      | SYNJ2          | 0.003008815      | CCNE1          | 0.010052928      | CDC42EP2       |
| NRP1        | 0.000160057      | ASAP2          | 0.003008815      | RAB23          | 0.010052928      | KIN            |
| CTSS        | 0.000165897      | GATA3          | 0.003008815      | C10orf55       | 0.010061291      | MAB21L1        |
| HPCAL1      | 0.000173119      | ADPRH          | 0.003008815      | PLAU           | 0.010061291      | WBP5           |
| GBP1        | 0.000180456      | IL27RA         | 0.003008815      | SMAGP          | 0.010061291      | TGFB1I1        |
| ERRFI1      | 0.000181298      | NFE2L2         | 0.003008815      | PSORS1C1       | 0.010061291      | CMAHP          |
| TNIK        | 0.000181298      | AKAP5          | 0.003097639      | CCNDBP1        | 0.010061291      | FAM214B        |
| LURAP1L     | 0.000191348      | ACTBL2         | 0.003170298      | TM7SF2         | 0.010080844      | ANGPTL4        |
| ICAM1       | 0.000191732      | SERPINB9       | 0.003230449      | LINC00472      | 0.010149621      | FHDC1          |
| ITGA2       | 0.000234191      | SLC2A1         | 0.003242612      | TRBV7-3        | 0.01035748       | TSPAN13        |
| MORC4       | 0.000257513      | NFKBIE         | 0.003477046      | C4orf19        | 0.010410563      | NPNT           |
| SPRED1      | 0.000294359      | ADGRF1         | 0.003537329      | UGDH           | 0.010540251      | LINC01605      |
| ZNF224      | 0.000338867      | PITPNC1        | 0.003537329      | ANKRD29        | 0.010629705      | VPS11          |
| SORL1       | 0.000353134      | C15orf39       | 0.003542188      | ELOVL6         | 0.010712793      | ZSCAN16        |
| UGCG        | 0.000365119      | CREG1          | 0.003549755      | PLPP1          | 0.010715669      | ANKRD42        |

|            |             |            |             |           |             |           |
|------------|-------------|------------|-------------|-----------|-------------|-----------|
| TACSTD2    | 0.000387554 | TGFA       | 0.003549755 | ALKBH1    | 0.010982774 | GPR137    |
| PLAUR      | 0.000387554 | SPRY1      | 0.003553257 | TMEM25    | 0.010982774 | CDC42EP1  |
| ARL4C      | 0.000387554 | GYLTL1B    | 0.003553741 | RNF167    | 0.01125514  | SELL      |
| ADGRF4     | 0.000407497 | BRPF3      | 0.003573157 | LINC00920 | 0.011389883 | C19orf33  |
| FAM69A     | 0.000437762 | SPRY4      | 0.003723628 | DTNA      | 0.011523819 | SEC61G    |
| HLA-E      | 0.000437762 | CD82       | 0.00375608  | RNF8      | 0.011533957 | ARMCX6    |
| C11orf24   | 0.000437762 | NAAA       | 0.003779846 | NGFRAP1   | 0.011653022 | FAM102A   |
| ANKRD37    | 0.000469335 | ADORA2B    | 0.003802871 | PPP1R18   | 0.011795165 | KRT23     |
| ARHGAP18   | 0.000475876 | ENTPD3     | 0.003802871 | NMNAT2    | 0.011889832 | ETV6      |
| SLC4A4     | 0.000513282 | MAML2      | 0.003806164 | SDC4      | 0.011889832 | ZNF350    |
| AHR        | 0.000525278 | MOB3A      | 0.003860904 | CD2AP     | 0.011889832 | ZNF570    |
| GBP3       | 0.000525278 | GSTM3      | 0.003966613 | PLEKHH2   | 0.011903464 | HLA-DRB1  |
| SMPDL3B    | 0.000525278 | MID2       | 0.004146738 | PIP4K2A   | 0.011919537 | RNF114    |
| CCNJL      | 0.000636608 | TAF8       | 0.004185897 | PSMB8     | 0.011923176 | FTH1      |
| PRKCA      | 0.00064348  | HLA-C      | 0.004192003 | GPR39     | 0.012245033 | STAM2     |
| ATP6V0D2   | 0.000711538 | TMCC3      | 0.004236238 | WDR37     | 0.012245894 | ZNF264    |
| GALNT3     | 0.000792901 | PTPN21     | 0.004431991 | PYCARD    | 0.012389506 | SAYSD1    |
| SHISA4     | 0.000810548 | KDM6B      | 0.00445608  | B4GALT6   | 0.012499147 | JUN       |
| SECTM1     | 0.000826364 | RNU6-1161P | 0.004478058 | CLK1      | 0.012556894 | ALOX5AP   |
| HID1       | 0.000844166 | FHL3       | 0.004709089 | VAT1      | 0.012610294 | HBEGF     |
| SLC17A5    | 0.000844166 | SH3PXD2A   | 0.004713704 | ZFPL1     | 0.012647405 | USP30-AS1 |
| C15orf48   | 0.000849595 | FAM174B    | 0.004929318 | ACER3     | 0.012647405 | OVOL1     |
| CXCL11     | 0.000854451 | SLC25A20   | 0.00504111  | NLRP3     | 0.012841728 | HYAL3     |
| PSMB9      | 0.000873697 | SIGIRR     | 0.005063829 | SLC16A13  | 0.013074443 | LIPG      |
| TFAP2A-AS1 | 0.000873697 | TSKU       | 0.005100798 | MIR22HG   | 0.013074443 | PLXNA3    |
| KCNK6      | 0.000873697 | BNIP3      | 0.00528604  | IL15RA    | 0.013074443 | MICB      |
| CDKN1A     | 0.000892315 | MYO5B      | 0.00541096  | SMURF2    | 0.01313579  | GULP1     |
| TNIP1      | 0.000931776 | SLC39A7    | 0.005591767 | P2RY6     | 0.013212965 | MIR222HG  |
| JARID2     | 0.001033824 | GATA6      | 0.005591903 | ZNF567    | 0.013592923 | BRE       |
| OPTN       | 0.001095746 | PLD5       | 0.005637688 | ANTXR2    | 0.013608878 | PPFIBP1   |
| TMEM63A    | 0.001164648 | SEC14L2    | 0.005637688 | CARD6     | 0.013622318 | TGM2      |
| KRTAP2-3   | 0.001164648 | PTK6       | 0.005637688 | CPA4      | 0.013634445 | TMEM106A  |
| C6orf226   | 0.001164648 | SIK3       | 0.005868849 | TFPT      | 0.013691185 | FAM210B   |
| SMARCA1    | 0.001173226 | SLC4A11    | 0.005868849 | FAM105A   | 0.013732542 | FAM127B   |
| DDR1       | 0.001187836 | WFS1       | 0.005924711 | BCAM      | 0.013843431 | ATP5L     |
| ZC3H12C    | 0.001213083 | SLC29A1    | 0.005924711 | CTSLP2    | 0.01393392  | ARMCX3    |
| IL31RA     | 0.001213083 | F8A1       | 0.005924711 | SLCO4A1   | 0.014367986 | LINC01424 |
| TRIOBP     | 0.001277321 | RRP36      | 0.005924711 | GOS2      | 0.0144328   | CHRD1     |
| GBP6       | 0.001329045 | IL22RA1    | 0.005980089 | TCTA      | 0.014613189 | SLCO3A1   |
| MANSC1     | 0.001329045 | CAPN1      | 0.006001289 | NHS       | 0.014613189 | ZEB1      |
| SLC30A4    | 0.001340209 | C11orf68   | 0.006025083 | GPAT3     | 0.014977651 | ZNF879    |
| CSF2       | 0.00144202  | NKX3-1     | 0.006060099 | MAX       | 0.014999237 | BTN2A1    |
| ROR1       | 0.001500586 | TESK1      | 0.006223273 | SUCO      | 0.015064211 | TRIM16L   |
| ENPP4      | 0.001564466 | FAM127A    | 0.006357988 | GNL1      | 0.015069456 | C11orf63  |
| TMEM171    | 0.001564466 | OTUB2      | 0.00638646  | SLC6A14   | 0.015251851 | SVIL-AS1  |
| LAMP3      | 0.00158998  | INPPL1     | 0.00638646  | APAF1     | 0.015350774 | SRPK1     |
| ATP9A      | 0.001630765 | HAS3       | 0.006426413 | GRAMD3    | 0.015350774 | SLC9A7P1  |

|        |             |          |             |           |             |         |
|--------|-------------|----------|-------------|-----------|-------------|---------|
| DNMBP  | 0.00163213  | C6orf136 | 0.006587402 | PSMD6-AS2 | 0.015490806 | GMPPA   |
| ERN1   | 0.001656095 | MREG     | 0.00671173  | APOBEC3D  | 0.015490806 | CNKSR2  |
| LPCAT2 | 0.001679827 | ICAM2    | 0.006749661 | TCEAL1    | 0.015490806 | IL23A   |
| TTC30A | 0.001706602 | SRPX2    | 0.006841876 | SH3D21    | 0.015490806 | ISM1    |
| PTGES  | 0.001706602 | FOXF2    | 0.007058985 | HLA-K     | 0.015495033 | ZFAND2A |
| CST7   | 0.001706602 | CLMP     | 0.007154586 | FMNL3     | 0.015626705 | LAMC2   |
| HAS2   | 0.001721338 | REP15    | 0.007174677 | LPIN2     | 0.015686191 | HMGA1   |
|        |             |          |             | ZNF134    | 0.016127259 | AKAP12  |

| Adjusted p value | Gene (400-499) | Adjusted p value | Gene (500-599) | Adjusted p value | Gene (600-644) | Adjusted p value |
|------------------|----------------|------------------|----------------|------------------|----------------|------------------|
| 0.016156571      | MAP3K8         | 0.023375319      | STRN           | 0.033941866      | POLB           | 0.045379834      |
| 0.016343572      | ADAM28         | 0.023637744      | S100A7         | 0.034119855      | FAM222A-AS1    | 0.04555556       |
| 0.016369458      | ACOXL          | 0.023680659      | SULT2B1        | 0.034119855      | PIP4K2C        | 0.04555556       |
| 0.016438854      | CST4           | 0.023680659      | HOXC13         | 0.034310424      | CEP250         | 0.045569429      |
| 0.016509469      | GDA            | 0.023682367      | HCCS           | 0.034349371      | CRYGC          | 0.045569429      |
| 0.016679626      | PXYLP1         | 0.023724662      | FBXO3          | 0.034435513      | ADNP-AS1       | 0.045703009      |
| 0.01685363       | BICC1          | 0.024547619      | TUBGCP2        | 0.034596288      | DLG3           | 0.045800647      |
| 0.017064984      | DNAJC1         | 0.024547619      | CTNS           | 0.03470494       | ANKRD30BL      | 0.045947094      |
| 0.017095889      | BTN2A2         | 0.024927732      | EEF1A1         | 0.03470494       | LINC00702      | 0.04596246       |
| 0.017160776      | SNRPA1         | 0.024927732      | FZD7           | 0.034877763      | RNF141         | 0.045978045      |
| 0.01750548       | PXDN           | 0.024967642      | FMNL1          | 0.035002307      | NLK            | 0.046278061      |
| 0.017579629      | TOR1B          | 0.024967642      | CXCL16         | 0.035115054      | CCND1          | 0.046556206      |
| 0.017854546      | KPNA7          | 0.025182137      | RNU6ATAC11P    | 0.035165463      | CDCP1          | 0.046687602      |
| 0.017908518      | TFF1           | 0.025182137      | TRPT1          | 0.035475854      | PUS3           | 0.046691115      |
| 0.017908518      | DNAJA4         | 0.025446272      | ZDHHC9         | 0.035576786      | DYRK1B         | 0.046691115      |
| 0.017908518      | ADAM19         | 0.025514925      | TMOD1          | 0.035784408      | TPM2           | 0.04681103       |
| 0.017908518      | MYL9           | 0.025514925      | RGS10          | 0.035885082      | ASB1           | 0.04682624       |
| 0.017908518      | AUH            | 0.025516031      | FRMD6          | 0.035937342      | PPP1R14C       | 0.046916108      |
| 0.017908518      | LINC01191      | 0.025539262      | VAR2           | 0.036205814      | RIC1           | 0.046916108      |
| 0.017908518      | LIF            | 0.025670833      | GPRC5C         | 0.036256956      | MRPL33         | 0.046916108      |
| 0.017908518      | GPR68          | 0.025670833      | IL4R           | 0.036277         | PNPLA3         | 0.046928887      |
| 0.017908518      | PLS1           | 0.025856315      | TMEM164        | 0.036438886      | TTC30B         | 0.047095923      |
| 0.017908518      | PBX2           | 0.025910042      | NAV1           | 0.036487135      | RTN2           | 0.047304061      |
| 0.017908518      | BCORL1         | 0.026112305      | FBXW10         | 0.036487135      | PRSS22         | 0.047527694      |
| 0.018092329      | MECOM          | 0.026188128      | IKZF2          | 0.036915863      | SMURF1         | 0.047581021      |
| 0.018097851      | LINC00665      | 0.026245761      | LINC00857      | 0.036915863      | TIMP1          | 0.047826943      |
| 0.018103082      | VSIG1          | 0.026425422      | GNG5           | 0.036915863      | SAMD12         | 0.047826943      |
| 0.018356674      | ZNF112         | 0.026425422      | SNPH           | 0.037537558      | NEIL1          | 0.047856187      |
| 0.018367811      | DENND2D        | 0.026425422      | NIPAL1         | 0.037686487      | AGPAT3         | 0.048009793      |
| 0.018367811      | SPINT2         | 0.026425422      | DDAH2          | 0.037884283      | RPS26          | 0.048111441      |
| 0.018550593      | ATP8A2         | 0.026425422      | FN3K           | 0.037971042      | AQP11          | 0.048340467      |
| 0.018637826      | PHF11          | 0.026682351      | MMP19          | 0.038005073      | COMMD9         | 0.048372744      |
| 0.018687224      | TTC9           | 0.026762794      | FOXA1          | 0.038326488      | SLC35A3        | 0.048431338      |
| 0.018942254      | PQLC3          | 0.026937467      | ALDH3A2        | 0.038330231      | PTPN12         | 0.048576098      |
| 0.018969963      | FLG            | 0.026962409      | PLEKHG4B       | 0.03856115       | UBA6-AS1       | 0.048576098      |
| 0.018969963      | WDR44          | 0.026965209      | ZNF185         | 0.038700803      | SERPIND1       | 0.048576098      |
| 0.019038551      | LPAR1          | 0.026965209      | HIST1H2AG      | 0.038802046      | RBPJ           | 0.048589109      |
| 0.019085658      | ALDH1A3        | 0.027096866      | AMPD3          | 0.03880321       | MARCKSL1       | 0.048806184      |
| 0.019085658      | SYTL4          | 0.027127696      | PTHLH          | 0.039016166      | FAM19A3        | 0.048826659      |
| 0.019240502      | DAAM1          | 0.027198621      | ARCN1          | 0.039157611      | NRIP3          | 0.04902509       |
| 0.019341426      | GCNT1          | 0.027202188      | FBXW7          | 0.039199556      | ZNF550         | 0.049132111      |
| 0.019348237      | CMTR1          | 0.027345487      | DLG4           | 0.039252826      | PRPF4B         | 0.049433006      |
| 0.019463698      | PDP1           | 0.027442638      | HAP1           | 0.039753237      | AXIN2          | 0.049477432      |
| 0.019475215      | HLA-DRA        | 0.027943897      | KIF3B          | 0.039903688      | TMC5           | 0.04981934       |
| 0.019475215      | ZNF808         | 0.028054053      | AFAP1          | 0.040013434      | LRRC1          | 0.04981934       |

|             |           |             |             |             |          |             |
|-------------|-----------|-------------|-------------|-------------|----------|-------------|
| 0.019475215 | SLC25A30  | 0.028152061 | ZFAND3      | 0.040539522 | MARVELD2 | 0.049942672 |
| 0.019541374 | NQO1      | 0.02819653  | ADAMTS1     | 0.040548934 |          |             |
| 0.019541374 | OCRL      | 0.028220205 | LINC01468   | 0.040565076 |          |             |
| 0.019615309 | MRPL14    | 0.028220205 | TGFB1       | 0.040565076 |          |             |
| 0.019642967 | SYTL2     | 0.028280984 | SENCR       | 0.040635943 |          |             |
| 0.019644058 | IKBKE     | 0.028635443 | DZANK1      | 0.040654901 |          |             |
| 0.019644058 | OARD1     | 0.028687644 | DGKE        | 0.040662809 |          |             |
| 0.019683334 | CALB2     | 0.029049312 | ERO1B       | 0.040937189 |          |             |
| 0.019797507 | FAM3C     | 0.029062067 | PARD3       | 0.040954034 |          |             |
| 0.019917398 | PRKCD     | 0.029076941 | ELF3        | 0.042127516 |          |             |
| 0.02004728  | SMIM13    | 0.029546234 | SIPA1       | 0.042127516 |          |             |
| 0.02004728  | RNF128    | 0.029733051 | MT1L        | 0.042130351 |          |             |
| 0.02004728  | FBXO18    | 0.029741987 | FOXQ1       | 0.042271641 |          |             |
| 0.02004728  | SLC43A3   | 0.029795551 | GALM        | 0.042283951 |          |             |
| 0.02004728  | GNG11     | 0.029919315 | PANX1       | 0.042348011 |          |             |
| 0.02004728  | MAST4-AS1 | 0.029919315 | TLR2        | 0.042460427 |          |             |
| 0.020101972 | SH3TC2    | 0.030092854 | IFITM10     | 0.042473707 |          |             |
| 0.020161544 | MAFG      | 0.030328693 | CD274       | 0.042473707 |          |             |
| 0.020248687 | LINC00518 | 0.030328693 | TRAF6       | 0.042642995 |          |             |
| 0.020272917 | ANKRD13A  | 0.030462386 | IRF6        | 0.042724516 |          |             |
| 0.020277818 | PLBD2     | 0.030559813 | CD46        | 0.042780005 |          |             |
| 0.020277818 | KRT15     | 0.030636424 | ANKLE1      | 0.042866451 |          |             |
| 0.020348665 | OSTF1     | 0.030636424 | NIPA1       | 0.042969576 |          |             |
| 0.020433898 | RSU1      | 0.030636424 | VGLL1       | 0.043059771 |          |             |
| 0.020889285 | INSIG2    | 0.030785223 | ADAMTS6     | 0.043059771 |          |             |
| 0.020889285 | KRT10     | 0.030785223 | HLA-F       | 0.043187635 |          |             |
| 0.020889887 | GGT5      | 0.031246681 | ELF4        | 0.043187635 |          |             |
| 0.021052744 | TSR2      | 0.031284631 | CYP4F3      | 0.043187635 |          |             |
| 0.021052744 | FOSL1     | 0.031286867 | ZNF416      | 0.043187635 |          |             |
| 0.021461759 | CCND3     | 0.031334088 | PPP1R15A    | 0.043279808 |          |             |
| 0.021461759 | PARD6B    | 0.031629937 | KIAA1217    | 0.043286327 |          |             |
| 0.021461759 | ZSCAN9    | 0.031760459 | CREG2       | 0.043287953 |          |             |
| 0.021464187 | BCL2L1    | 0.032212053 | KMO         | 0.043361413 |          |             |
| 0.021470443 | RPL7L1    | 0.032487029 | STAP2       | 0.043361413 |          |             |
| 0.021545624 | TRIM8     | 0.032620996 | NFYA        | 0.043361413 |          |             |
| 0.021545624 | CHST14    | 0.032620996 | FER1L4      | 0.043361413 |          |             |
| 0.021545624 | SAMD15    | 0.032682163 | HLA-G       | 0.043389556 |          |             |
| 0.021853842 | CRAT      | 0.032776072 | MID1IP1-AS1 | 0.043440707 |          |             |
| 0.021853842 | TBRG1     | 0.032776072 | TMEM263     | 0.043467151 |          |             |
| 0.021931395 | SORT1     | 0.032793151 | IFT46       | 0.043581893 |          |             |
| 0.021931395 | IL1R2     | 0.032793151 | CTC1        | 0.044065786 |          |             |
| 0.021983553 | G3BP2     | 0.032793151 | EPGN        | 0.044065786 |          |             |
| 0.022300907 | CLDN23    | 0.032793151 | HCAR1       | 0.044065786 |          |             |
| 0.022300907 | BAD       | 0.032804124 | CHRNB1      | 0.044126916 |          |             |
| 0.022329893 | UPF2      | 0.03296191  | STK40       | 0.044140233 |          |             |
| 0.022329893 | KCNRG     | 0.03296191  | PLAC8       | 0.044187049 |          |             |
| 0.022700658 | PRDM8     | 0.033213916 | LENG8       | 0.044187049 |          |             |

|             |         |             |        |             |
|-------------|---------|-------------|--------|-------------|
| 0.022700658 | ANKRD22 | 0.033431339 | ZBTB4  | 0.04428393  |
| 0.023150655 | LCMT1   | 0.033554546 | DHRS9  | 0.044327232 |
| 0.02316008  | STRA6   | 0.033560206 | NRGN   | 0.044355107 |
| 0.023225537 | FBLN7   | 0.033560206 | GDE1   | 0.044394548 |
| 0.02328184  | FAM126B | 0.033652361 | BRD2   | 0.044394548 |
| 0.023325015 | YIPF4   | 0.033779048 | CUL2   | 0.044762166 |
| 0.023325015 | TNFAIP2 | 0.033796265 | MT-TP  | 0.045137719 |
| 0.023325015 | ABTB2   | 0.033818495 | PPP1CB | 0.045302093 |
